# Supplementary material for: Intrinsic control of neuronal diversity and synaptic specificity in a proprioceptive circuit
Source: eLife. 2020 Aug 18;9:e56374. doi: 10.7554/eLife.56374 (PMC7467731; doi:10.7554/eLife.56374)
Supplement: Figure 2—source data 1. [file elife-56374-fig2-data1.xlsx]

## Sheet: Pea3
Control side	Ablated side
0.24498	0.0530973
0.401316	0.0484848
0.192308	0.0539419
0.193548	0.0134529
0.329268	0.0568182
0.548	0.130435
0.494118	0.0877193
0.366667	0.0609137
0.356383	0.02
0.311927	0.0564972
0.141304	0.0437158
0.235294	0.0330579

## Sheet: Hoxa5
Control side	Ablated side
0.727273	0.7
0.311111	0.414286
0.590909	0.426471
0.465116	0.363636
0.369565	0.55
0.369231	0.538462
0.527273	0.37037
0.460674	0.5
0.178571	0.505882
0.571429	0.578947
0.297297	0.633333

## Sheet: Hoxc6
Control side	Ablated side
0.301802	0.297872
0.333333	0.124138
0.235294	0.558824
0.245098	0.201058
0.075	0.236364
0.295455	0.230769
0.305263	0.290155
0.419355	0.150794
0.324675	0.232558
0.174242	0.307692
0.243243	0.228261
0.265823	0.33871
0.245098	0.227642
0.283333
0.274194

## Sheet: Hoxc8
Control side	Ablated side
0.0590909	0.0843373
0.0663265	0.0583942
0.105802	0.0480349
0.0833333	0.121212
0.0505837	0.0869565
0.0373134	0.0612245
0.0487805	0.0716981
	0.0827251

## Sheet: Runx3
Control side	Ablated side
0.147982	0.105505
0.311024	0.021277
0.013889	0.11236
0.263158	0.12
0.034247	0.108696
0.034091	0.063927
0.122517	0.048
0.243478	0.032258
0.239691	0.110132
0.163636	0.028571
0.326693	0.04955
0.051724	0.039216
0.042254	0.093264
0.279279	0.1
0.274194	0.125581
0.153543	0.030717
0.077236	0.085324
0.061017	0.041176
0.102941
