# Supplementary material for: Intrinsic control of neuronal diversity and synaptic specificity in a proprioceptive circuit
Source: eLife. 2020 Aug 18;9:e56374. doi: 10.7554/eLife.56374 (PMC7467731; doi:10.7554/eLife.56374)
Supplement: Figure 3—source data 1. [file elife-56374-fig3-data1.xlsx]

## Sheet: Figure 3
hoxc8+er81/total hoxc8	hoxc8+er81/er81	hoxc8+pv+/total hoxc8+	hoxc8+pv+/pv total
1	0.235294	1	0.071429
1	0.327273	1	0.108696
0.934783	0.632353	1	0.222222
0.862069	0.862069	1	0.348485
1	0.913043	1	0.333333
0.92	1	0.8	0.5
0.8	1	0.846154	0.733333
1	0.5	0.5	0.545455
1	1	0.9	0.818182
1	1	0.785714	0.55
1	1	0.666667	0.125
1	1	1	0.246575
1	1	0.941176	0.390244
0.833333	0.123457	0.85	0.395349
0.916667	0.255814	0.909091	0.869565
0.942857	0.383721	1	0.52381
1	0.657143	0.809524	0.772727
0.904762	0.76	0.888889	0.533333
0.866667	1	0.954545	0.913043
0.769231	0.909091	0.9375	0.202703
1	1	1	0.260274
1	1	0.925	0.362745
1	1	0.857143	0.428571
0.875	1	0.954545	0.677419
1	1	0.909091	0.588235
1	1	1	0.851852
1	1	1	0.55
1	1	1	0.888889
1	1
0.923077	1
