# Supplementary material for: Intrinsic control of neuronal diversity and synaptic specificity in a proprioceptive circuit
Source: eLife. 2020 Aug 18;9:e56374. doi: 10.7554/eLife.56374 (PMC7467731; doi:10.7554/eLife.56374)
Supplement: Figure 5—source data 1. [file elife-56374-fig5-data1.xlsx]

## Sheet: bGalPV
control	Hoxc8 SN mut
0.391304	0.366667
0.3125	0.355556
0.266667	0.295775
0.214286	0.318182
0.358974	0.412698
0.322581	0.714286
0.416667	0.489362
0.571429	0.380952
0.5	0.333333
0.714286	0.40625
0.818182	0.75
0.378378	0.6
0.25	0.5
0.111111	0.25
0.309524	0.328767
0.245614	0.206897
0.142857	0.363636
0.333333	0.4
0.555556	0.666667
0.53125	0.705882
0.666667	0.647059
0.57377	0.666667
0.339623	0.296296
0.428571	0.480769
0.223301	0.393443
0.237288	0.354167
0.318182	0.275
0.416667	0.431818
0.529412	0.347826
0.53125	0.423077
0.392857	0.611111
0.5	0.666667
0.888889

## Sheet: PV Isl
control	Hoxc8 SN mut
0.175497	0.28436
0.211823	0.232258
0.281915	0.335443
0.324138	0.257028
0.369863	0.252336
0.2625	0.238318
0.157895	0.293578
0.567568	0.216374
0.184	0.153846
0.099291	0.076023
0.072165	0.163043
0.111111	0.080569
0.095238	0.256684
0.182171	0.353659
0.225664	0.417722
0.323529	0.383886
0.380342	0.265896
0.25098	0.343373
0.207071	0.18
0.300493	0.108696
0.121429	0.109375
0.079498	0.357143
0.0837	0.216667
0.067669	0.0625
0.221429	0.538462
0.265193	0.192
0.299145	0.099415
0.270968	0.121212
0.193069	0.126582
0.266667	0.301587
0.233766	0.337423
0.090909	0.208633
0.04	0.235294
0.105991	0.090909
0.146789	0.107143
0.208333	0.15493
0.273381	0.148148
0.485714	0.254902
0.283721	0.337662
0.239264	0.33871
0.234783	0.382716
0.309278	0.292683
0.115789	0.216667
0.083916	0.44
0.107914	0.111111
0.126761	0.095745
0.043165	0.152174
0.275281	0.053763
0.384937	0.228155
0.323404	0.516484
0.257669	0.285714
0.288732	0.239024
0.395349	0.306818
0.247475	0.224638
0.119792	0.7
0.060976	0.194915
0.083333	0.106667
0.335106	0.165919
0.228188	0.235294
0.236842	0.18
0.423963	0.052846
0.340314	0.049751
0.235849	0.37037
0.186275	0.396104
0.256098	0.257282
0.215789	0.283465
0.187135	0.268868
0.082873	0.347518
	0.211111
	0.112195
	0.162037
	0.071823
	0.042781
	0.075145

## Sheet: bGal-CTB-PV FCU
Ctrl	Hoxc8SNΔ
0.636364	0.606061
0.785714	0.761905
0.533333	0.5
0.652174

## Sheet: PV fiber
Control	Hoxc8SNΔ
80.31	79.003
79.061	80.969
86.874	83.37
