# Supplementary material for: Intrinsic control of neuronal diversity and synaptic specificity in a proprioceptive circuit
Source: eLife. 2020 Aug 18;9:e56374. doi: 10.7554/eLife.56374 (PMC7467731; doi:10.7554/eLife.56374)
Supplement: Figure 7—source data 1. [file elife-56374-fig7-data1.xlsx]

## Sheet: RabV FCU
Control	Hoxc8 SN∆
0	0.338675
0	0.309286
0	0.214286
0	0.185185
0

## Sheet: Rabv PL
Control	Hoxc8 SN∆
0	0.330882
0	0.608333
0.03125	0.166667
0
